# Supplementary material for: Intracellular Localization of Blattella germanica Densovirus (BgDV1) Capsid Proteins
Source: MDPI journal article supplement (doi:10.3390/v10070370), 2018-07-14
Supplement: s1 [file s1]

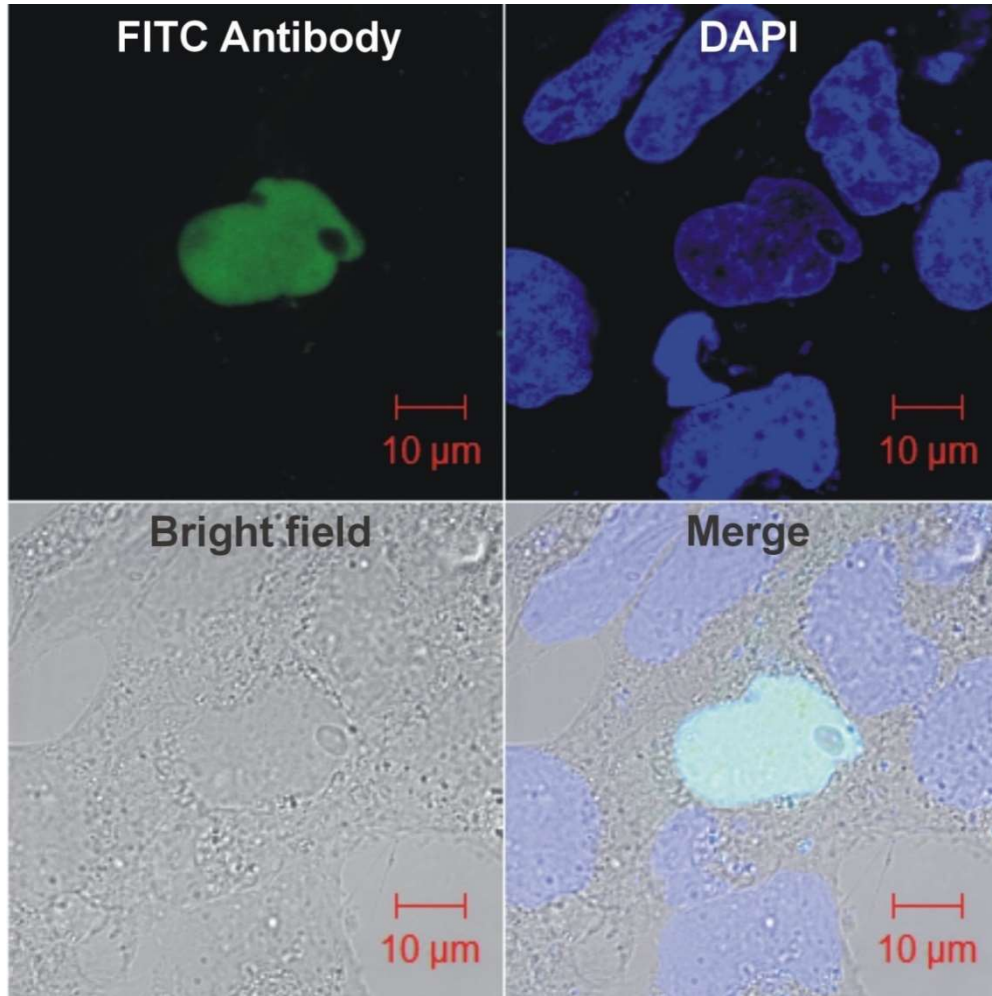

**Figure S1.** Indirect immunofluorescence of Cos-1 cells transiently expressing the capsid BgDV1 VP3 protein fused with GFP. The transfected Cos-1 cells transiently expressing N-fused with GFP VP3 protein were fixed in 4% PFA and subsequently immunostained with both primary rabbit antibodies against the C-end part of VP1 capsid protein and goat anti-rabbit FITC-conjugated secondary antibody. Cell nuclei were counterstained with DAPI. The intracellular localization of the fluorescent signals was analyzed by confocal microscopy.
